# Supplementary material for: Occurrence and human risk assessment of pharmaceutically active compounds (PhACs) in indoor dust from homes, schools and offices
Source: Environ Sci Pollut Res Int. 2024 Jul 30;31(37):49682–93. doi: 10.1007/s11356-024-34459-4 (PMC11324665; doi:10.1007/s11356-024-34459-4)
Supplement: Supplementary file 2 — Supplementary file2 (XLSX 22 KB) [file 11356_2024_34459_MOESM2_ESM.xlsx]

## Sheet: Table S9. Homes (n=18)
			Acetaminophen	Atenolol	Carbamazepine	Clarithromycin	Clotrimazole	Erythromycin	Anhydroerythromycin	Fluconazole	Irbesartan	Metoprolol	Miconazole	Naproxen	Sulfamethoxazole	Thiabendazole	Trimethoprim	Valsartan	Children (number)	Teenagers (number)	Adults (number)	Number of times the house/office/classroom is vacuumed/washed per month	Natural ventilation (min/week)
Spearman's Rho	Acetaminophen	Correlation coefficient	1
		Sig. (2-tailed)	.
		N	18
	Atenolol	Correlation coefficient	-1	1
		Sig. (2-tailed)	1	.
		N	2	2
	Carbamazepine	Correlation coefficient	0	.	1
		Sig. (2-tailed)	1	.	.
		N	4	0	4
	Clarithromycin	Correlation coefficient	.	.	.	.
		Sig. (2-tailed)	.	.	.	.
		N	0	0	0	0
	Clotrimazole	Correlation coefficient	0.049	-1	.	.	1
		Sig. (2-tailed)	0.894	1	.	.	.
		N	10	2	1	0	10
	Erythromycin	Correlation coefficient	-1	.	1.000(**)	.	.	1
		Sig. (2-tailed)	1	.	.	.	.	.
		N	2	0	2	0	1	2
	Anhydroerythromycin	Correlation coefficient	-0.094	.	1.000(**)	.	.	.	1
		Sig. (2-tailed)	0.842	.	.	.	.	.	.
		N	7	2	2	0	2	1	7
	Fluconazole	Correlation coefficient	0.5	.	.	.	.	.	1.000(**)	1
		Sig. (2-tailed)	0.667	.	.	.	.	.	.	.
		N	3	0	1	0	1	0	2	3
	Irbesartan	Correlation coefficient	-0.5	.	.	.	.	.	.	.	1
		Sig. (2-tailed)	0.667	.	.	.	.	.	.	.	.
		N	3	0	0	0	1	0	1	0	3
	Metoprolol	Correlation coefficient	.	.	.	.	.	.	.	.	.	.
		Sig. (2-tailed)	.	.	.	.	.	.	.	.	.	.
		N	1	0	0	0	0	0	1	0	0	1
	Miconazole	Correlation coefficient	.	.	.	.	.	.	.	.	.	.	.
		Sig. (2-tailed)	.	.	.	.	.	.	.	.	.	.	.
		N	1	0	0	0	1	0	0	0	0	0	1
	Naproxen	Correlation coefficient	.	.	.	.	.	.	.	.	.	.	.	.
		Sig. (2-tailed)	.	.	.	.	.	.	.	.	.	.	.	.
		N	0	0	0	0	0	0	0	0	0	0	0	0
	Sulfamethoxazole	Correlation coefficient	.	.	.	.	.	.	.	.	.	.	.	.	.
		Sig. (2-tailed)	.	.	.	.	.	.	.	.	.	.	.	.	.
		N	1	0	0	0	1	0	0	0	0	0	0	0	1
	Thiabendazole	Correlation coefficient	0.218	-1	0.5	.	-0.301	.	0.264	0.5	1.000(**)	.	.	.	.	1
		Sig. (2-tailed)	0.435	1	0.667	.	0.431	.	0.668	0.667	.	.	.	.	.	.
		N	15	2	3	0	9	1	5	3	2	1	1	0	1	15
	Trimethoprim	Correlation coefficient	.	.	.	.	.	.	.	.	.	.	.	.	.	.	.
		Sig. (2-tailed)	.	.	.	.	.	.	.	.	.	.	.	.	.	.	.
		N	0	0	0	0	0	0	0	0	0	0	0	0	0	0	0
	Valsartan	Correlation coefficient	.	.	.	.	.	.	.	.	.	.	.	.	.	.	.	.
		Sig. (2-tailed)	.	.	.	.	.	.	.	.	.	.	.	.	.	.	.	.
		N	1	0	0	0	0	0	1	0	0	1	0	0	0	1	0	1
	Children (number)	Correlation coefficient	-0.177	.	.	.	0.437	.	0.214	.	-0.5	.	.	.	.	-0.122	.	.	1
		Sig. (2-tailed)	0.482	.	.	.	0.207	.	0.645	.	0.667	.	.	.	.	0.665	.	.	.
		N	18	2	4	0	10	2	7	3	3	1	1	0	1	15	0	1	18
	Teenagers (number)	Correlation coefficient	0.411	.	0.258	.	0.304	.	.	0	.	.	.	.	.	0.028	.	.	-0.095	1
		Sig. (2-tailed)	0.09	.	0.742	.	0.394	.	.	1	.	.	.	.	.	0.922	.	.	0.708	.
		N	18	2	4	0	10	2	7	3	3	1	1	0	1	15	0	1	18	18
	Adults (number)	Correlation coefficient	-0.451	1.000(**)	0.8	.	-0.478	1.000(**)	-0.257	0	0.866	.	.	.	.	-0.083	.	.	-0.162	-0.45	1
		Sig. (2-tailed)	0.06	.	0.2	.	0.162	.	0.578	1	0.333	.	.	.	.	0.769	.	.	0.522	0.061	.
		N	18	2	4	0	10	2	7	3	3	1	1	0	1	15	0	1	18	18	18
	Number of times the house/office/classroom is vacuumed/washed per month	Correlation coefficient	0.424	-1	-1.000(**)	.	-0.065	-1	0.671	.	-1.000(**)	.	.	.	.	0.165	.	.	-0.097	0.423	-0.451	1
		Sig. (2-tailed)	0.101	1	0	.	0.858	1	0.215	.	0	.	.	.	.	0.591	.	.	0.721	0.102	0.079	.
		N	16	2	3	0	10	2	5	1	3	1	1	0	1	13	0	1	16	16	16	16
	Natural ventilation (min/week)	Correlation coefficient	-0.014	-1	-0.5	.	-0.371	-1	-0.229	.	0.866	.	.	.	.	0.094	.	.	-0.488	-.515(*)	0.144	-0.164	1
		Sig. (2-tailed)	0.959	1	0.667	.	0.291	1	0.71	.	0.333	.	.	.	.	0.761	.	.	0.055	0.041	0.596	0.544	.
		N	16	2	3	0	10	2	5	1	3	1	1	0	1	13	0	1	16	16	16	16	16
**	Correlation is significant at the 0.01 level (2-tailed).
*	Correlation is significant at the 0.05 level (2-tailed).

## Sheet:  Table S9. Total (n=85)
			Acetaminophen	Atenolol	Carbamazepine	Clarithromycin	Clotrimazole	Erythromycin	Anhydroerythromycin	Fluconazole	Irbesartan	Metoprolol	Miconazole	Naproxen	Sulfamethoxazole	Thiabendazole	Trimethoprim	Valsartan
Spearman's Rho	Acetaminophen	Correlation coefficient	1
		Sig. (2-tailed)	.
		N	85
	Atenolol	Correlation coefficient	-1	1
		Sig. (2-tailed)	1	.
		N	2	2
	Carbamazepine	Correlation coefficient	-0.429	.	1
		Sig. (2-tailed)	0.337	.	.
		N	7	0	7
	Clarithromycin	Correlation coefficient	.	.	.	.
		Sig. (2-tailed)	.	.	.	.
		N	1	0	0	1
	Clotrimazole	Correlation coefficient	-0.014	-1	.	.	1
		Sig. (2-tailed)	0.921	1	.	.	.
		N	50	2	1	1	50
	Erythromycin	Correlation coefficient	-1	.	1.000(**)	.	.	1
		Sig. (2-tailed)	1	.	.	.	.	.
		N	2	0	2	0	1	2
	Anhydroerythromycin	Correlation coefficient	0.159	.	.	.	0.33	.	1
		Sig. (2-tailed)	0.556	.	.	.	0.294	.	.
		N	16	0	1	0	12	0	16
	Fluconazole	Correlation coefficient	0.536	.	.	.	0.8	.	.	1
		Sig. (2-tailed)	0.215	.	.	.	0.2	.	.	.
		N	7	0	1	0	4	0	1	7
	Irbesartan	Correlation coefficient	0.571	.	.	.	-1.000(**)	.	.	.	1
		Sig. (2-tailed)	0.18	.	.	.	0	.	.	.	.
		N	7	0	0	0	3	0	0	0	7
	Metoprolol	Correlation coefficient	.	.	.	.	.	.	.	.	.	.
		Sig. (2-tailed)	.	.	.	.	.	.	.	.	.	.
		N	1	0	0	0	0	0	0	0	0	1
	Miconazole	Correlation coefficient	0.36	.	.	.	0.273	.	.	.	.	.	1
		Sig. (2-tailed)	0.342	.	.	.	0.554	.	.	.	.	.	.
		N	9	0	0	0	7	0	1	0	1	0	9
	Naproxen	Correlation coefficient	-1	.	.	.	-1	.	.	.	.	.	.	1
		Sig. (2-tailed)	1	.	.	.	1	.	.	.	.	.	.	.
		N	2	0	0	0	2	0	0	0	1	0	1	2
	Sulfamethoxazole	Correlation coefficient	0.037	.	.	.	0.5	.	.	.	.	.	1.000(**)	.	1
		Sig. (2-tailed)	0.937	.	.	.	0.667	.	.	.	.	.	.	.	.
		N	7	0	1	0	3	0	1	0	0	0	2	0	7
	Thiabendazole	Correlation coefficient	-0.123	-1	0.1	.	0.095	.	0.078	-0.144	-0.1	.	0.644	-1	-0.643	1
		Sig. (2-tailed)	0.319	1	0.873	.	0.535	.	0.821	0.758	0.873	.	0.061	1	0.119	.
		N	68	2	5	0	45	1	11	7	5	1	9	2	7	68
	Trimethoprim	Correlation coefficient	-0.5	.	.	.	1.000(**)	.	.	.	.	.	.	.	.	-1.000(**)	1
		Sig. (2-tailed)	0.667	.	.	.	.	.	.	.	.	.	.	.	.	0	.
		N	3	0	0	0	2	0	0	0	0	0	0	0	1	3	3
	Valsartan	Correlation coefficient	.	.	.	.	.	.	.	.	.	.	.	.	.	.	.	.
		Sig. (2-tailed)	.	.	.	.	.	.	.	.	.	.	.	.	.	.	.	.
		N	1	0	0	0	0	0	0	0	0	1	0	0	0	1	0	1
	**	Correlation is significant at the 0.01 level (2-tailed).
	*	Correlation is significant at the 0.05 level (2-tailed).
